# Supplementary figures and images for: Eosinophil‐derived neurotoxin and clinical outcomes with mepolizumab in severe eosinophilic asthma
Source: PubMed Central journal article supplement — Allergy. 2020 Mar 23;75(8):10.1111/all.14266. doi: 10.1111/all.14266 (PMC7592754; doi:10.1111/all.14266), 2020-03-23

**A**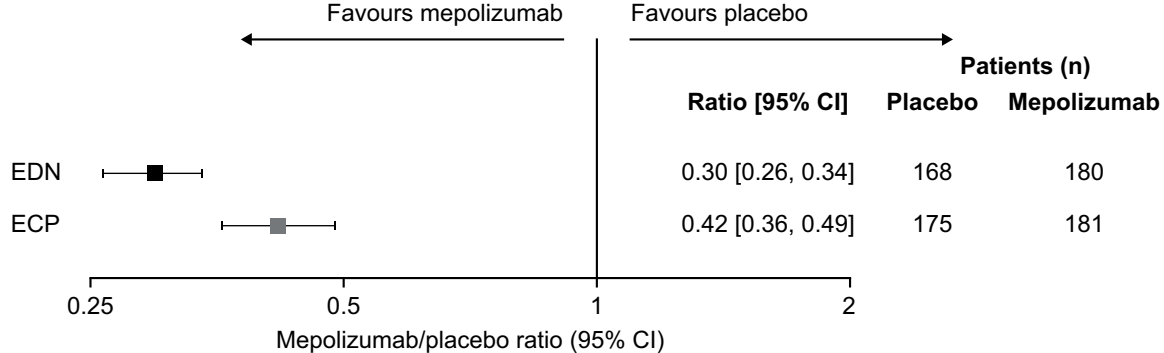**B**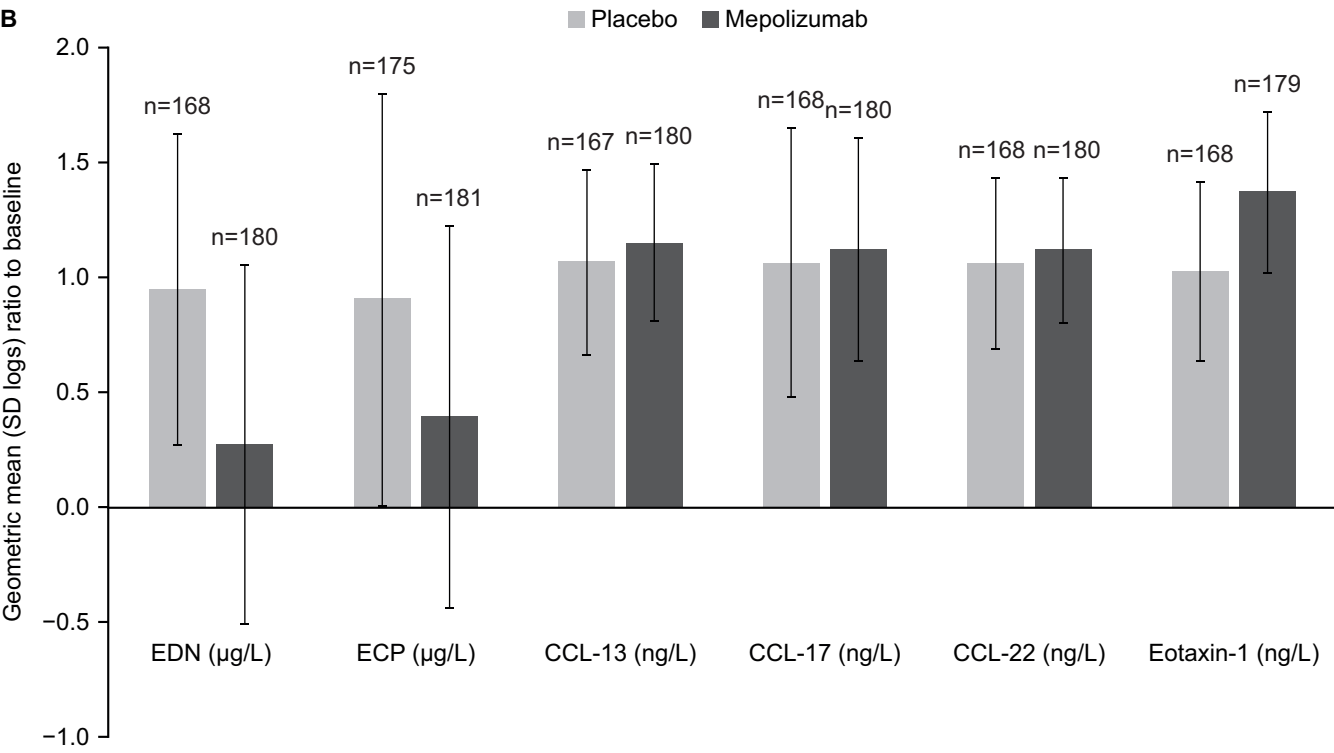

Supplement: ALL-75-na-s002.pdf [file ALL-75-na-s002.pdf]
